# Supplementary material for: Determination of metal ion concentrations by SERS using 2,2′-bipyridyl complexes
Source: Royal Society of Chemistry journal article supplement (doi:10.1039/c5an01525a), 2015-01-01
Supplement: c5an01525a1.pdf [file c5an01525a1.pdf]

## Determination of metal ion concentrations by SERS using 2,2'-bipyridyl complexes

Julie Docherty, Samuel Mabbott, W. Ewen Smith, John Reglinski, Karen Faulds, Christine Davidson and Duncan Graham

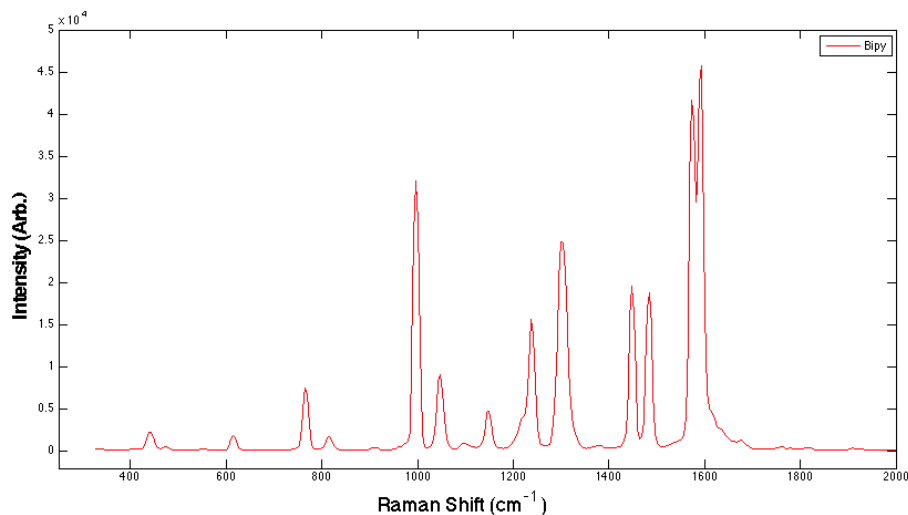

Figure S1: Raman spectrum of solid bipy ( $\lambda_{\text{ex}} = 532 \text{ nm}$ , acc. time = 10 s)

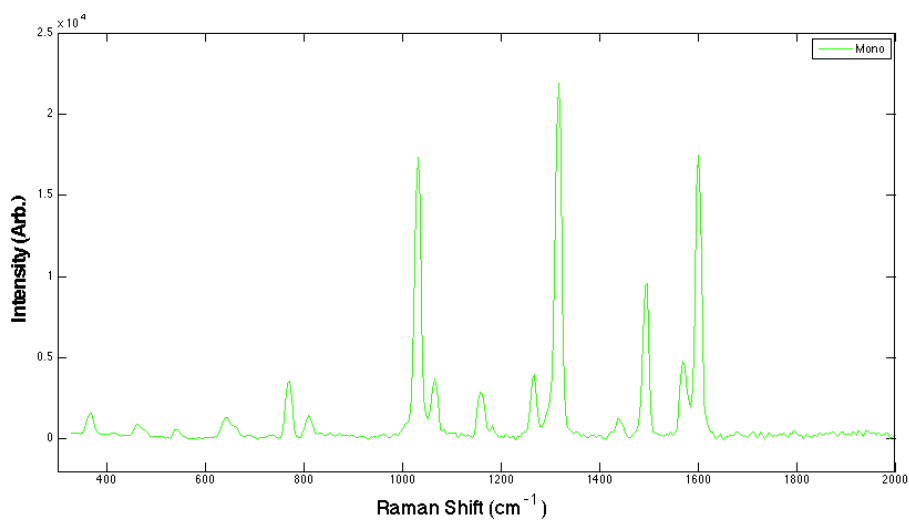

Figure S2: Raman spectrum of solid bipy-Zn(II) complex in the mono form ( $\lambda_{\text{ex}} = 532 \text{ nm}$ , acc. time = 10 s)

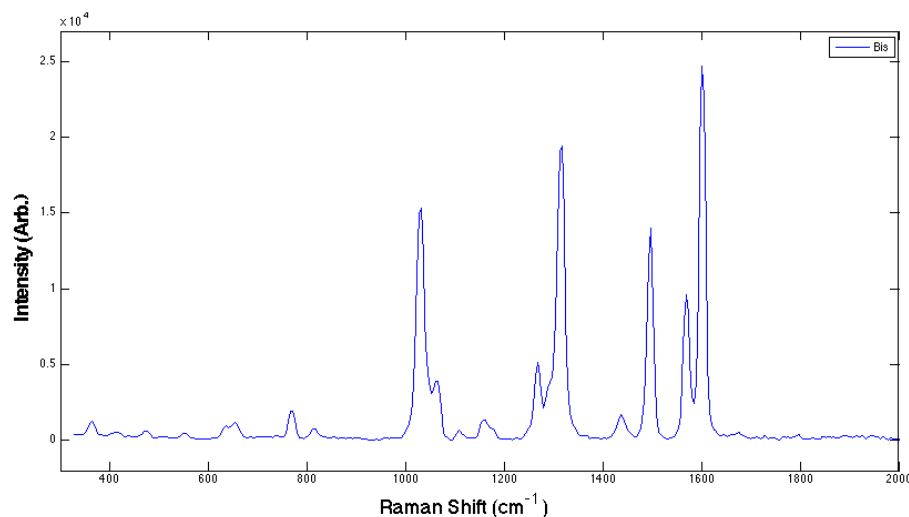

Figure S3: Raman spectrum of solid bipy-Zn(II) complex in the bis form ( $\lambda_{\text{ex}} = 532 \text{ nm}$ , acc. time = 10 s)

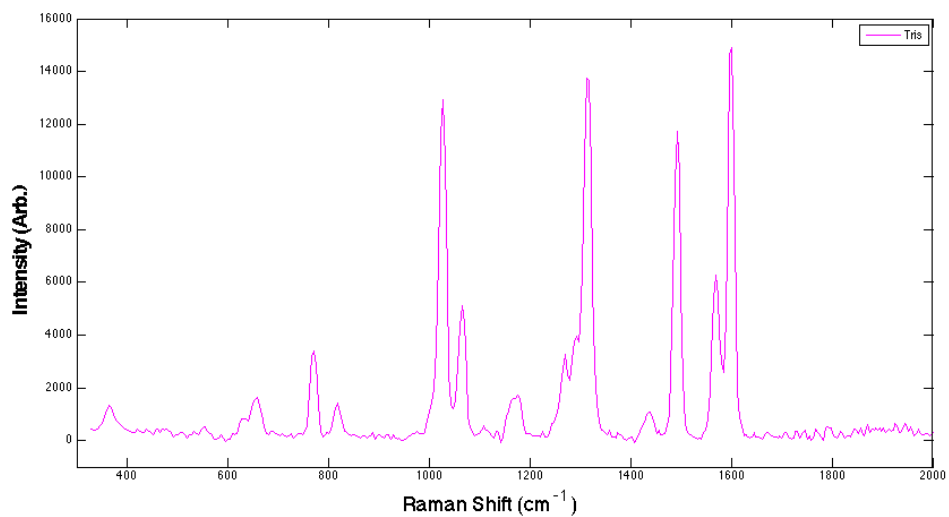

Figure S4: Raman spectrum of solid bipy-Zn(II) complex in the tris form ( $\lambda_{\text{ex}} = 532 \text{ nm}$ , acc. time = 10 s)

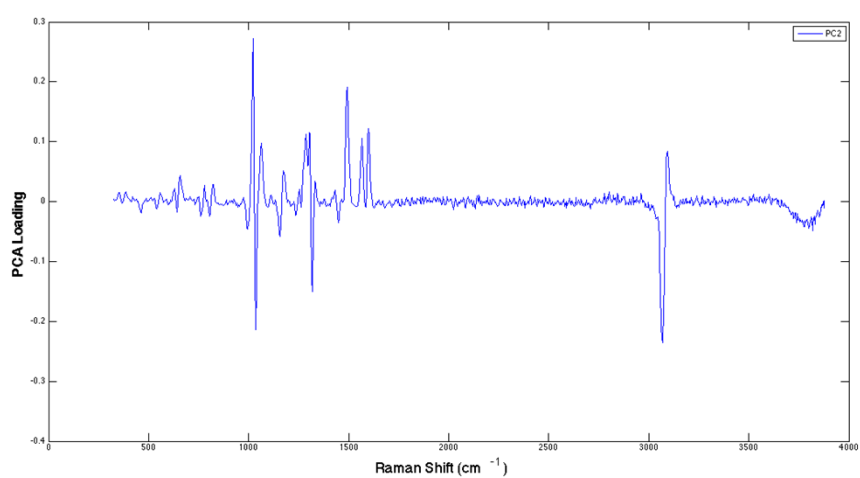

Figure S5: PC1 loadings plot for the solid bipy-Zn(II) complexes

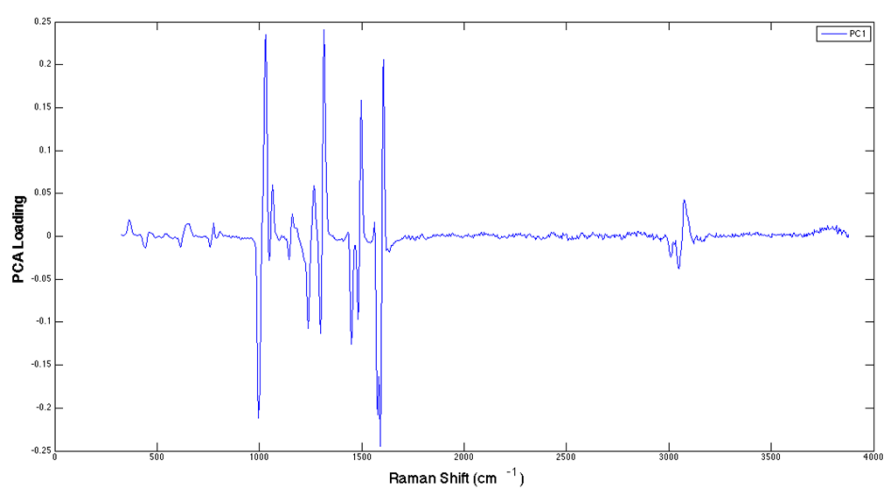

Figure S6: PC2 loadings plot for the solid bipy-Zn(II) complexes

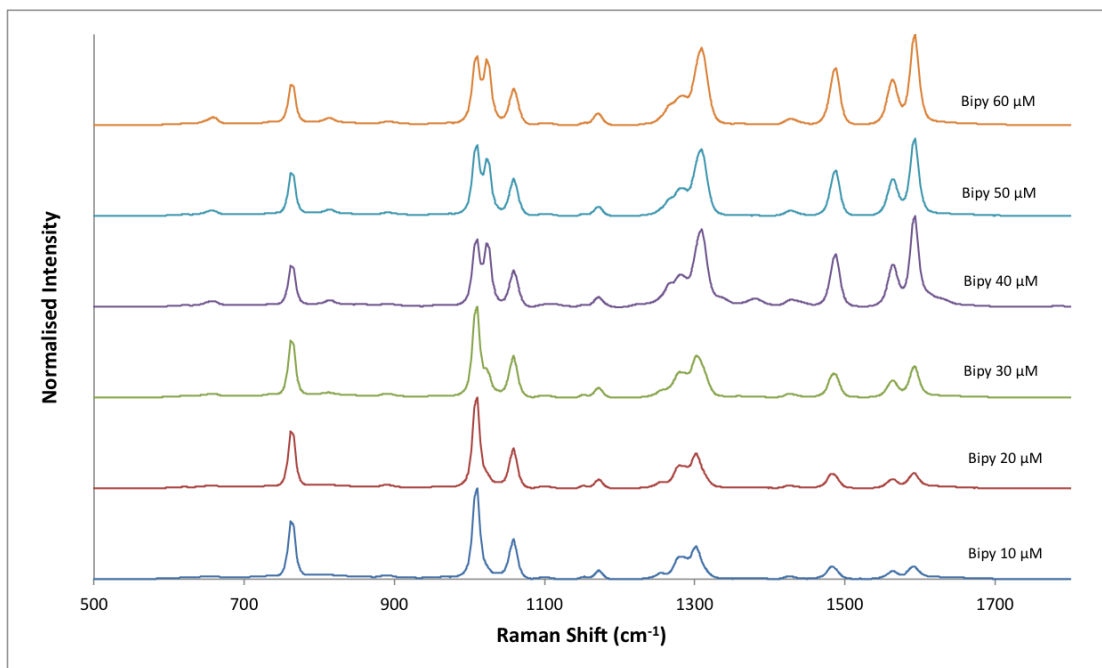

Figure S7: Concentration study of 10 μM Zn(II) added to increasing concentrations of bipy. 60 μM, orange; 50 μM, light blue; 40 μM, purple; 30 μM, green; 20 μM, red; 10 μM, dark blue ( $\lambda_{\text{ex}} = 532 \text{ nm}$ , acc. time = 10 s)
